# Supplementary material for: Obstetric and perinatal health outcomes after pertussis vaccination during pregnancy in Ontario, Canada: a retrospective cohort study
Source: PubMed Central journal article supplement — CMAJ Open. 2021 Apr 13;9(2):E349. doi: 10.9778/cmajo.20200239 (PMC8084546; doi:10.9778/cmajo.20200239), 2021-04-13
Supplement: supp_9.2.E349_2020-0239-original-submission.pdf [file supp_9.2.E349_2020-0239-original-submission.pdf]

1  
2  
3 **1 Obstetric and perinatal health outcomes following pertussis immunization during pregnancy in**  
4 **2 Ontario, Canada**  
5  
6

7 4 Romina Fakhraei<sup>1,2</sup>, MSc; Natasha Crowcroft<sup>3,4</sup>, MD(Cantab); Shelly Bolotin<sup>4,5</sup>, PhD; Steven Hawken<sup>2,3,6</sup>,  
8 5 PhD; Kumanan Wilson<sup>2,7</sup>, MD; Laura Gaudet<sup>8,9</sup>, MD; Gayatri Amirthalingam<sup>10</sup>, MD; Anne Biringer<sup>4,11</sup>,  
9 6 MD; Jocelynn Cook<sup>6,12</sup>, PhD; Vinita Dubey<sup>4,13</sup>, MD; Scott A. Halperin<sup>14</sup>, MD; Frances Jamieson<sup>4,5</sup>, MD;  
10 7 Jeffrey C. Kwong<sup>3,4,5</sup>, MD; Manish Sadarangani<sup>15,16</sup>, PhD; Mark C. Walker<sup>2,6</sup>, MD; Meghan Laverty<sup>6</sup>,  
11 8 MSc; Deshayne B. Fell<sup>1,3,6</sup>, PhD

12  
13 **9 Affiliations**

14 10 Children's Hospital of Eastern Ontario (CHEO) Research Institute, Ottawa, Canada<sup>1</sup>; Ottawa Hospital  
15 11 Research Institute, Ottawa, Canada<sup>2</sup>; ICES, Toronto and Ottawa, Canada<sup>3</sup>; University of Toronto,  
16 12 Toronto, Canada<sup>4</sup>; Public Health Ontario, Toronto, Canada<sup>5</sup>; University of Ottawa, Ottawa, Canada<sup>6</sup>;  
17 13 Bruyère Research Institute, Ottawa, Canada<sup>7</sup>; Kingston Health Sciences Centre, Kingston, Canada<sup>8</sup>;  
18 14 Queen's University, Kingston, Canada<sup>9</sup>; Public Health England, London, United Kingdom<sup>10</sup>; Mount Sinai  
19 15 Hospital, Toronto, Canada<sup>11</sup>; The Society of Obstetricians and Gynaecologists of Canada, Ottawa,  
20 16 Canada<sup>12</sup>; Toronto Public Health, Toronto, Canada<sup>13</sup>; Canadian Centre for Vaccinology, Dalhousie  
21 17 University and the IWK Health Centre<sup>14</sup>; Vaccine Evaluation Center, BC Children's Hospital Research  
22 18 Institute<sup>15</sup>; Department of Pediatrics, University of British Columbia<sup>16</sup>

23  
24 19 **Funding:** This study was supported by operating grants from the Canadian Institutes of Health Research  
25 20 (PJT-159519 and MY7-161351) and by ICES, which is funded by an annual grant from the Ontario  
26 21 Ministry of Health and Long-Term Care (MOHLTC). Parts of this material are based on data and  
27 22 information compiled and provided by MOHLTC, Canadian Institute for Health Information (CIHI) and  
28 23 the Immigration, Refugees and Citizenship Canada (IRCC). However, the analyses, conclusions, opinions  
29 24 and statements expressed herein are solely those of the authors and do not reflect those of the funding or  
30 25 data sources; no endorsement is intended or should be inferred.

31  
32 26 **Competing interests:** SAH has received research grants/contracts from and has served on ad hoc  
33 27 advisory boards for GlaxoSmithKline and Sanofi Pasteur (unrelated to this study), manufacturers of Tdap  
34 28 vaccines. MS is supported via salary awards from the BC Children's Hospital Foundation, the Canadian  
35 29 Child Health Clinician Scientist Program and the Michael Smith Foundation for Health Research. MS has  
36 30 been an investigator on projects funded by Pfizer, Merck, Seqirus, VBI Vaccines and GlaxoSmithKline.  
37 31 All funds have been paid to his institute, and he has not received any personal payments.

38  
39  
40 32 **Acknowledgements:** The authors wish to thank Immigration, Refugees and Citizenship Canada (IRCC)  
41 33 for providing data to ICES, where the analyses were conducted.

42  
43 34 **Ethics:** Research ethics board approval was acquired from the Children's Hospital of Eastern Ontario  
44 35 Research Ethics Board (Protocol No. 18/10PE), the Ottawa Hospital Science Network Research Ethics  
45 36 Board (Protocol No 20180432-01H), and the ICES Privacy Office (Protocol No. 2018 0901 166 000).

46  
47 37 **Corresponding author:**

48 38 Deshayne B. Fell, PhD  
49 39 Assistant Professor, School of Epidemiology and Public Health, University of Ottawa  
50 40 Scientist, Children's Hospital of Eastern Ontario (CHEO) Research Institute  
51 41 Adjunct Scientist, ICES  
52 42 401 Smyth Road, Centre for Practice Changing Research, Room L1154  
53 43 Ottawa, Ontario, Canada, K1H 8L1  
54 44 [dfell@cheo.on.ca](mailto:dfell@cheo.on.ca)  
55 45 +1 613 737 7600 Ext. 6033

1  
2  
3 46 **ABSTRACT**

47 **Background:** In February 2018, Canada's National Advisory Committee on Immunization (NACI)  
48 recommended maternal immunization with Tetanus-diphtheria-acellular pertussis (Tdap) during every  
49 pregnancy as a strategy to prevent severe pertussis infection in young infants. This study assessed the  
50 relationship between maternal Tdap immunization with obstetric and perinatal outcomes in Ontario.

51 **Methods:** We performed a population-based cohort study of all live births prior to NACI's  
52 recommendation (April 2012 to March 2017), using multiple health administrative databases. We used  
53 extended Cox regression models with time-dependent exposures to estimate adjusted hazards ratios (aHR)  
54 for preterm and very preterm birth. Remaining outcomes (gestational hypertension, chorioamnionitis,  
55 postpartum hemorrhage, small-for-gestational-age [SGA] birth, neonatal intensive care unit [NICU]  
56 admissions >24 hours, neonatal morbidity composite outcome) were assessed using log-binomial  
57 regression to generate adjusted risk ratios (aRR). Estimates were adjusted using propensity score  
58 matching.

59 **Results:** We matched 11,750 Tdap-exposed pregnancies to 58,747 unexposed pregnancies and did not  
60 find increased risks (aHR/aRR [95% CI]) for preterm birth (0.95 [0.89-1.02]) or very preterm birth (1.15  
61 [0.89-1.47]). Risk of SGA birth (0.91 [0.85-0.97]), NICU admission (0.84 [0.78-0.91]), and neonatal  
62 morbidity (0.79 [0.73-0.86]) were decreased. Maternal Tdap immunization was not associated with  
63 chorioamnionitis (0.98 [0.82-1.17]), postpartum hemorrhage (1.04 [0.92-1.17]), or severe postpartum  
64 hemorrhage (0.88 [0.60-1.30]), and we observed a reduced risk for gestational hypertension (0.82 [0.74-  
65 0.91]).

66 **Interpretation:** These results complement existing evidence that maternal Tdap vaccination is not  
67 associated with adverse outcomes in either mothers or infants. Ongoing evaluation in Canada is needed as  
68 maternal Tdap coverage increases in the coming years.

69

## 70 INTRODUCTION

71 Pertussis, an infectious vaccine-preventable illness, remains a public health challenge owing to  
72 repeated outbreaks in many countries, including Canada.<sup>1-5</sup> Infants under 1 year who have not completed  
73 their primary vaccine series are at highest risk for pertussis-related morbidity and mortality.<sup>6,7</sup> Pertussis  
74 vaccination during pregnancy with a reduced antigen acellular pertussis-containing vaccine (Tetanus-  
75 diphtheria-acellular pertussis [Tdap]) has been shown to convey passive immunity to newborns through  
76 transplacental transfer of maternal antibodies.<sup>8,9</sup>

77 In February 2018, Canada's National Advisory Committee on Immunization (NACI) joined countries  
78 such as the United States (US)<sup>10</sup> and United Kingdom (UK)<sup>11</sup> in recommending Tdap immunization  
79 during every pregnancy, ideally between 27 and 32 weeks' gestation.<sup>12</sup> During the 5 year-period  
80 preceding NACI's recommendation, some Canadian maternity care providers were already immunizing  
81 pregnant women against pertussis, likely on the basis of successful programs in the US and UK,<sup>10,11</sup> as  
82 well as earlier temporary provincial<sup>13</sup> and national<sup>14</sup> Canadian recommendations. With the release of the  
83 2018 NACI recommendation,<sup>12</sup> a substantial increase in the number of Canadian women vaccinated with  
84 Tdap vaccine during pregnancy over the next few years is likely.

85 Despite a growing literature on safety of maternal pertussis vaccination,<sup>15-28</sup> studies currently  
86 available focus predominantly on the US and UK revealing a need for Canadian research, owing to  
87 differences in pertussis epidemiology, immunity profiles, historical vaccine formulations and schedules,  
88 recommended timing of Tdap during pregnancy, and health care system characteristics. Moreover,  
89 inconsistent findings from earlier studies suggesting possible associations with chorioamnionitis<sup>16,25,28</sup> and  
90 postpartum hemorrhage<sup>28</sup> warrant further investigation. To provide baseline evidence on maternal Tdap  
91 immunization in Canada in the pre-NACI policy era, we assessed whether receipt of Tdap during  
92 pregnancy was associated with any risk of adverse obstetric or perinatal outcomes in a large, population-  
93 based study in Ontario.

## 94 METHODS

## 95 **Study design, data sources and study population**

96 We conducted a population-based retrospective cohort study of all hospital live births in Ontario  
97 between April 1, 2012 and March 3, 2017. The MOMBABY database, containing linked maternal and  
98 newborn hospital records, was used to assemble the study cohort and provide additional information (e.g.,  
99 gestational age, birth weight, maternal age, parity). We linked five other health administrative databases:  
100 Registered Persons Database, providing information on neighbourhood income, region of residence, and  
101 healthcare eligibility; Canadian Institute for Health Information Discharge Abstract Database (CIHI-  
102 DAD), capturing hospital admissions (medical diagnoses and procedures); Ontario Health Insurance Plan  
103 (OHIP) Database, containing physician billing claims; Permanent Resident Database, with maternal  
104 country of birth; and the Ontario Marginalization Index (ON-Marg), which uses Census data to quantify  
105 the level of marginalization in Ontario. Further description of data sources is provided in Supplement  
106 Table A. Datasets were linked using unique encoded identifiers and analyzed at ICES. Diagnostic and  
107 procedural codes were from the Canadian implementation of the International Classification of Diseases,  
108 10th Revision (ICD-10-CA) and the Canadian Classification of Health Interventions (CCI), respectively.

109 We excluded maternal-infant records for administrative reasons (e.g., invalid identifiers, duplicate  
110 records, linkage warnings) (Figure 1). To allow for complete exposure and outcome information, we  
111 excluded records belonging to non-Ontario residents or women who did not have continuous OHIP  
112 enrolment during pregnancy. As birth weight and gestational age were critical for defining our perinatal  
113 outcomes, we applied an algorithm<sup>29,30</sup> to exclude records with implausible birth weight and gestational  
114 age combinations, based on a Canadian reference standard.<sup>31</sup> We additionally excluded records belonging  
115 to women younger than 12 years or older than 50 years of age and those ending in stillbirth.

## 116 **Exposure and outcome measurement**

117 We ascertained Tdap during pregnancy using a billing code (G847) in the OHIP database. Tdap  
118 vaccination was classified as occurring during the pregnancy if administered 14 days after the last

1  
2  
3 119 menstrual period (estimated by subtracting gestational age from date of birth) through to 1 day before  
4  
5 120 delivery. Obstetric outcomes included gestational hypertension, chorioamnionitis, postpartum  
6  
7 121 hemorrhage, and severe postpartum hemorrhage (postpartum hemorrhage combined with hysterectomy,  
8  
9 122 blood transfusion, or other procedures to control bleeding). These outcomes were identified using ICD-  
10  
11 123 10-CA codes from any maternal hospitalization record during the pregnancy, including the delivery itself.  
12  
13 124 Perinatal outcomes were chosen based on prior vaccine safety research, overall importance to perinatal  
14  
15 125 health, and recommendations made by the Global Alignment of Immunization Safety Assessment in  
16  
17 126 Pregnancy collaboration.<sup>32</sup> We examined five perinatal outcomes: preterm birth (<37 weeks' gestation),  
18  
19 127 very preterm birth (<32 weeks' gestation), small-for-gestational-age [SGA] birth (<10<sup>th</sup> percentile for  
20  
21 128 gestational age- and sex-specific birth weight based on a Canadian reference standard<sup>31</sup>), neonatal  
22  
23 129 intensive care unit (NICU) admissions >24 hours, and an adaptation<sup>33</sup> of the composite neonatal adverse  
24  
25 130 outcome indicator (NAOI)<sup>34</sup> (infants with  $\geq 1$  of 15 neonatal diagnoses or 7 procedures within 28 days  
26  
27 131 following birth). Outcome definitions and associated database codes are presented in Supplement Tables  
28  
29 132 B and C.

### 33 133 **Statistical analyses**

34  
35  
36 134 We used frequencies to describe the distribution of baseline categorical variables and  
37  
38 135 standardized differences to compare the distributions between Tdap-exposed and unexposed women, with  
39  
40 136 an absolute value above 0.10 considered indicative of an imbalanced covariate.<sup>35,36</sup> To address potential  
41  
42 137 confounding, we matched five Tdap-unexposed women to each Tdap-exposed women based on the  
43  
44 138 propensity score, computed using a logistic regression model that included all baseline covariates  
45  
46 139 available in the databases, and an index for adequacy of prenatal care<sup>37</sup> (Supplement Tables D and E). We  
47  
48 140 matched without replacement, using the greedy method and caliper width score of  $\pm 0.2$  standard  
49  
50 141 deviations.<sup>36,38</sup> Records missing covariate information were excluded; the percentage of records missing  
51  
52 142 information across one or more covariates in the propensity score model was <1%.

1  
2  
3 143 We used Cox regression with a time-dependent exposure variable to generate hazard ratios (HR)  
4  
5 144 and 95% confidence intervals (CI) for preterm and very preterm birth, limiting analyses to women who  
6  
7 145 received the Tdap vaccine before 37 weeks' gestation (preterm birth) or before 32 weeks' gestation (very  
8  
9 146 preterm birth)<sup>39</sup> and censored ongoing gestations upon completing 37 weeks or 32 weeks for preterm birth  
10  
11 147 and very preterm birth, respectively. Log-binomial regression was used to compute risk ratios (RR) and  
12  
13 148 95% CI for the remaining outcomes: gestational hypertension, chorioamnionitis, postpartum hemorrhage,  
14  
15 149 severe postpartum hemorrhage, SGA, NICU admission >24 hours, and neonatal morbidity (NAOI).  
16  
17  
18 150 General estimating equations with an independent correlation structure were used to account for multiple  
19  
20 151 deliveries to a unique woman. Statistical analyses were conducted using SAS version 9.4.  
21  
22

23 152 We assessed the potential impact of our analytical strategies on the findings through sensitivity  
24  
25 153 analyses. First, we incorporated general OHIP vaccine codes (G538, G539) billed during pregnancy (but  
26  
27 154 not between October 1 to January 31, as these were more likely to be influenza vaccinations) into an  
28  
29 155 expanded exposure definition additionally capturing *possible* Tdap vaccination during pregnancy. Second,  
30  
31 156 to account for potential differences in maternal healthcare seeking or access among exposed and  
32  
33 157 unexposed subjects, we additionally adjusted for the number of maternal outpatient visits and non-  
34  
35 158 obstetric hospital admissions within six months and two years before the index pregnancy, respectively.  
36  
37  
38 159 Lastly, we repeated our analyses using inverse probability of treatment weights—an alternative method of  
39  
40 160 confounding adjustment using propensity scores.<sup>40</sup>  
41  
42  
43

161

## 162 RESULTS

46 163 After exclusions, there were 621,903 eligible live births, of whom 11,750 (1.9%) were born to  
47  
48 164 mothers who received Tdap vaccination during pregnancy (Figure 1). In the full unmatched population,  
49  
50 165 vaccinated women were more likely to be nulliparous and live in higher-income neighbourhoods (Table  
51  
52 166 1). Following propensity score matching, 11,750 Tdap-exposed women were matched to 58,747  
53  
54  
55  
56  
57  
58  
59  
60

1  
2  
3 167 unexposed. Standardized differences for all baseline characteristics were attenuated following matching,  
4  
5 168 with no values exceeding 0.1 (Supplement Figure).  
6  
7

8 169 In the unmatched population, the rate of chorioamnionitis was slightly higher among Tdap-  
9  
10 170 vaccinated than unvaccinated women (1.23% vs. 0.99%); however, there was no increased risk of  
11  
12 171 chorioamnionitis associated with Tdap vaccination during pregnancy in propensity-score matched  
13  
14 172 analyses (aRR: 0.98; 95% CI: 0.82, 1.17; Table 2). Receipt of Tdap during pregnancy was not associated  
15  
16 173 with postpartum hemorrhage (aRR: 1.04; 95% CI: 0.92, 1.17) or severe postpartum hemorrhage (aRR:  
17  
18 174 0.88; 95% CI: 0.60, 1.30), but we observed a significant inverse association between Tdap vaccination  
19  
20 175 and gestational hypertension even after adjustment for confounding through propensity-score matching  
21  
22 176 (aRR: 0.82; 95% CI: 0.74, 0.91).  
23  
24  
25

26 177 In the unmatched population comparing Tdap-exposed infants with unexposed, the cumulative  
27  
28 178 incidences were similar for preterm birth (6.03% vs. 7.93%) and there was no evidence of increased risk  
29  
30 179 associated with vaccination (aHR: 0.95; 95% CI: 0.89, 1.02; Table 2). We observed reduced risks of SGA  
31  
32 180 birth (aRR: 0.91; 95% CI: 0.85, 0.97), NICU admissions >24 hours (aRR: 0.84; 95% CI: 0.78, 0.91) and  
33  
34 181 neonatal morbidity (aRR: 0.79; 95% CI: 0.73, 0.86) associated with Tdap vaccination during pregnancy.  
35  
36

37 182 In sensitivity analyses, the *possible* Tdap exposure definition additionally captured 2,845 records,  
38  
39 183 bringing the number of exposed subjects to 14,595. Matching these subjects with 72,970 unexposed and  
40  
41 184 repeating our analyses had minimal impact on the study outcomes (Supplement Table F), with the  
42  
43 185 exception of SGA birth which was slightly attenuated in magnitude and no longer associated with Tdap  
44  
45 186 during pregnancy (aRR: 0.94; 95% CI: 0.89, 1.01). Adjustment for maternal healthcare utilization before  
46  
47 187 the index pregnancy and confounding adjustment through propensity score weighting, instead of  
48  
49 188 matching, had little impact on our main findings (Supplement Table G).  
50  
51

52 189  
53  
54 190 **INTERPRETATION**  
55  
56



1  
2  
3 191 In this large population-based cohort study, we examined obstetric and perinatal outcomes among  
4  
5 192 over 11,000 Ontario women who received Tdap vaccination during pregnancy. We found no association  
6  
7 193 between vaccination and chorioamnionitis, postpartum hemorrhage, severe postpartum hemorrhage,  
8  
9 194 preterm birth, or very preterm birth. We observed reductions in risk for gestational hypertension, SGA  
10  
11 195 birth, NICU admissions >24 hours, and neonatal morbidity among Tdap-exposed subjects.  
12  
13

14 196 Our study results concur with a growing body of research providing reassuring evidence that  
15  
16 197 Tdap immunization during pregnancy is not associated poor perinatal outcomes, such as preterm  
17  
18 198 birth<sup>15,17,19,20,23,25,26,41,42</sup> and SGA birth.<sup>17,20,25,41</sup> While it is possible that the risk reductions we observed for  
19  
20 199 SGA birth, NICU admissions >24 hours, and neonatal morbidity are due to non-specific beneficial effects  
21  
22 200 of maternal Tdap vaccination (i.e., vaccine protection beyond the targeted disease<sup>43</sup>), there is limited  
23  
24 201 evidence supporting this concept in the context of maternal immunization. Given known biases in  
25  
26 202 observational studies on immunization,<sup>44</sup> we also cannot rule out the possibility of residual confounding  
27  
28 203 inducing a healthy vaccinee bias.  
29  
30

31  
32 204 Although this is the first maternal Tdap study that has utilized the NAOI composite outcome, to  
33  
34 205 our knowledge, others have examined individual components of the composite. A large US cohort study  
35  
36 206 by Layton et al. consisting of over 1 million pregnant women (148,817 immunized with Tdap during  
37  
38 207 pregnancy) found no increased risks of adverse newborn outcomes, such as respiratory distress or  
39  
40 208 seizures, but reported a reduced risk of neonatal sepsis among infants born to Tdap-vaccinated women.<sup>28</sup>  
41  
42 209 DeSilva et al. did not observe any associations between Tdap vaccination during pregnancy and transient  
43  
44 210 tachypnea, neonatal sepsis, neonatal pneumonia, respiratory distress syndrome, or newborn convulsions.<sup>16</sup>  
45  
46 211 A smaller single-centre cohort study by Morgan et al.<sup>17</sup> found similar rates of neonatal complications  
47  
48 212 including ventilation requirement, sepsis and intraventricular hemorrhage between Tdap-exposed and  
49  
50 213 unexposed infants. A recent New Zealand cohort study, comprising approximately 70,000 infants, found a  
51  
52 214 reduced risk of respiratory distress syndrome (aOR: 0.65; 95 CI: 0.52, 0.81) among Tdap-exposed infants  
53  
54 215 compared with unexposed.<sup>20</sup>  
55  
56  
57  
58  
59  
60



1  
2  
3 216 Current evidence on Tdap vaccination during pregnancy and chorioamnionitis has been  
4  
5 217 inconsistent. Three studies have reported an increased risk of chorioamnionitis among women vaccinated  
6  
7 218 with Tdap during pregnancy; reassuringly, none demonstrated any increased risks for adverse infant  
8  
9 219 outcomes typically associated with chorioamnionitis, such as preterm birth.<sup>16,25,28</sup> Similar to other studies  
10  
11 220 by Morgan et al.<sup>17</sup> and Berenson et al.,<sup>15</sup> we did not find any association with chorioamnionitis after  
12  
13 221 adjustment for potential confounding through our propensity-score matched analyses. Moreover, this  
14  
15 222 result was robust throughout all sensitivity analyses. Our finding that Tdap was also not associated with  
16  
17 223 risk of postpartum hemorrhage aligns with two previous studies.<sup>21,23</sup> In the UK, Donegan et al. reported  
18  
19 224 on national surveillance data in the first six months of maternal Tdap program implementation and found  
20  
21 225 no association with postpartum hemorrhage.<sup>21</sup> Similarly, receipt of Tdap in pregnancy was not associated  
22  
23 226 with postpartum hemorrhage in a New Zealand cohort of 68,550 women.<sup>23</sup> Using a large insurance claims  
24  
25 227 database in the US, Layton et al. observed an increased risk of postpartum hemorrhage following  
26  
27 228 maternal Tdap vaccination during pregnancy, though the association was attenuated after they accounted  
28  
29 229 for healthcare access and behaviours in sensitivity analyses.<sup>28</sup>

30  
31  
32  
33 230 We are unaware of any biological mechanism to explain the protective relationship we observed  
34  
35 231 between Tdap vaccination and gestational hypertension; previous studies<sup>23,25</sup> have not reported any  
36  
37 232 association between Tdap and this outcome. We believe our finding most likely reflects residual  
38  
39 233 confounding and healthy vaccinee bias; compared to unvaccinated women, those vaccinated might  
40  
41 234 represent a healthier population that engage in behaviours that also lower their risk for gestational  
42  
43 235 hypertension. Additionally, the lack of information regarding the timing of disease onset precluded our  
44  
45 236 ability to account for temporality of the association in our analyses. In contrast, Griffin et al., who were  
46  
47 237 able to account for the timing of diagnosis in relation to timing of vaccination, found no association  
48  
49 238 between Tdap vaccination and gestational hypertension.<sup>23</sup> Such temporal issues are known to be  
50  
51 239 influential in studies of vaccination during pregnancy.<sup>44,45</sup>

1  
2  
3 240 Strengths of our study include its population-based design, comprising a source population of  
4  
5 241 over 600,000 births. Despite achieving good balance of baseline covariates in our matched sample, the  
6  
7 242 propensity scores were limited to measured variables available in the study databases. Importantly, there  
8  
9 243 was no information about maternal smoking, alcohol and drug use, or body mass index; thus, we cannot  
10  
11 244 dismiss the possibility of residual bias due to unmeasured potential confounders. Although timing of  
12  
13 245 vaccination was available in the database, we lacked information on timing of disease onset for  
14  
15 246 gestational hypertension and could not determine the temporality of the exposure-outcome relationship  
16  
17 247 which may have affected our results. This was not a concern for other obstetric outcomes, such as  
18  
19 248 chorioamnionitis and postpartum hemorrhage, as diagnosis typically occurs during the peripartum period.  
20  
21 249 Ontario currently limits public funding for Tdap boosters in adults to one dose.<sup>46</sup> It is possible that care  
22  
23 250 providers refrained from billing for the Tdap vaccine to avoid additional costs for the mother, who would  
24  
25 251 thus be misclassified as unexposed. Further, vaccine-specific codes, including G847 for Tdap, were  
26  
27 252 introduced only 7 months before the start of our study period and if not billed correctly, could have  
28  
29 253 resulted in exposure misclassification.<sup>47</sup> However, our sensitivity analysis which additionally included  
30  
31 254 *possible* Tdap vaccinations billed under a generic immunization code were essentially identical to our  
32  
33 255 main analyses. Although the sensitivity of the Tdap vaccine code in our study population was unclear,  
34  
35 256 specificity was likely high, as OHIP billing claims have previously demonstrated high specificity for  
36  
37 257 immunization among children<sup>47</sup> and adults.<sup>48</sup> Because Tdap vaccination during pregnancy was uncommon  
38  
39 258 in our study and specificity was high, any non-differential misclassification of the exposure likely had a  
40  
41 259 small impact on the magnitude of our point estimates.<sup>49</sup>  
42  
43  
44  
45

260

## 261 CONCLUSION

262 Our findings corroborate existing literature and provide further support for the safety of Tdap  
263 immunization during pregnancy. Importantly, we found no indication of increased risk for postpartum  
264 hemorrhage or chorioamnionitis following Tdap immunization in the Ontario setting; earlier studies from  
265 other countries have reported equivocal results for these outcomes. This study provides preliminary safety

1  
2  
3  
4  
5  
6  
7  
8  
9  
10  
11  
12  
13  
14  
15  
16  
17  
18  
19  
20  
21  
22  
23  
24  
25  
26  
27  
28  
29  
30  
31  
32  
33  
34  
35  
36  
37  
38  
39  
40  
41  
42  
43  
44  
45  
46  
47  
48  
49  
50  
51  
52  
53  
54  
55  
56  
57  
58  
59  
60

266 information on maternal Tdap vaccination in Canada, which is important for establishing baseline data to  
267 inform evolving maternal immunization initiatives and providing reassurance when discussing Tdap  
268 recommendations with pregnant women. Future studies using more contemporary data extending into the  
269 post-NACI policy time period will be important for further developing the evidence base in Canada.

270  
271  
272  
273  
274  
275  
276  
277  
278  
279  
280  
281  
282

Confidential

## 284 REFERENCES

- 285 1. Smith T, Rotondo J, Desai S, Deehan H. Pertussis surveillance in Canada: Trends to 2012. *Can*  
286 *Commun Dis Rep* 2014;40:21-30.
- 287 2. Jackson DW, Rohani P. Perplexities of pertussis: Recent global epidemiological trends and their  
288 potential causes. *Epidemiol Infect* 2014;142:672-84.
- 289 3. Tan T, Dalby T, Forsyth K, et al. Pertussis across the globe: Recent epidemiologic trends from  
290 2000 to 2013. *Pediatr Infect Dis J* 2015;34:e222-32.
- 291 4. Chiappini E, Stival A, Galli L, de Martino M. Pertussis re-emergence in the post-vaccination era.  
292 *BMC Infect Dis* 2013;13:151.
- 293 5. Celentano LP, Massari M, Paramatti D, Salmaso S, Tozzi AE. Resurgence of pertussis in Europe.  
294 *Pediatr Infect Dis J* 2005;24:761-5.
- 295 6. Van Hoek A, Campbell H, Amirthalingam G, Andrews N, Miller E. The number of deaths among  
296 infants under one year of age in England with pertussis: Results of a capture/recapture analysis for  
297 the period 2001 to 2011. *Euro Surveill* 2013;18:15-20.
- 298 7. von König CH, Halperin S, Riffelmann M, Guiso N. Pertussis of adults and infants. *Lancet Infect*  
299 *Dis* 2002;2:744-50.
- 300 8. Dabrera G, Amirthalingam G, Andrews N, et al. A case-control study to estimate the effectiveness  
301 of maternal pertussis vaccination in protecting newborn infants in England and Wales, 2012-2013.  
302 *Clin Infect Dis* 2015;60:333-7.
- 303 9. Abu Raya B, Edwards KM, Scheifele DW, Halperin SA. Pertussis and influenza immunisation  
304 during pregnancy: a landscape review. *Lancet Infect Dis* 2017;17:e209-e222.
- 305 10. Centers for Disease Control and Prevention (CDC). Updated recommendations for use of tetanus  
306 toxoid, reduced diphtheria toxoid, and acellular pertussis vaccine (Tdap) in pregnant women--  
307 Advisory Committee on Immunization Practices (ACIP), 2012. *MMWR Morb Mortal Wkly Rep*  
308 2013;62:131-5.
- 309 11. Amirthalingam G, Letley L, Campbell H, Green D, Yarwood J, Ramsay M. Lessons learnt from  
310 the implementation of maternal immunization programs in England. *Hum Vaccin Immunother*  
311 2016;12:2934-9.
- 312 12. Public Health Agency of Canada. *An Advisory Committee Statement (ACS) National Advisory*  
313 *Committee on Immunization (NACI): Update on Immunization in Pregnancy with Tetanus Toxoid,*  
314 *Reduced Diphtheria Toxoid and Reduced Acellular Pertussis (Tdap) Vaccine.* Ottawa, Canada;  
315 2018.
- 316 13. Public Health Agency of Canada. *An Advisory Committee Statement (ACS) National Advisory*  
317 *Committee on Immunization (NACI) - Update on Pertussis Vaccination in Pregnancy.* Ottawa,  
318 Canada; 2014. doi:HP40-93/2014E-PDF.
- 319 14. Gruslin A, Steben M, Halperin S, Money DM, Yudin MH. SOGC Clinical Practice Guideline No.  
320 220. Immunization in Pregnancy. *Int J Gynaecol Obstet* 2008;105:187-91.
- 321 15. Berenson AB, Hirth JM, Rahman M, Laz TH, Rupp RE, Sarpong KO. Maternal and infant  
322 outcomes among women vaccinated against pertussis during pregnancy. *Hum Vaccin Immunother*  
323 2016;12:1965-71.
- 324 16. DeSilva M, Vazquez-Benitez G, Nordin JD, et al. Maternal Tdap vaccination and risk of infant

- 1  
2  
3 325 morbidity. *Vaccine* 2017;35:3655-60.  
4  
5 326 17. Morgan JL, Baggari SR, McIntire DD, Sheffield JS. Pregnancy outcomes after antepartum tetanus,  
6 327 diphtheria, and acellular pertussis vaccination. *Obstet Gynecol* 2015;125:1433-8.  
7  
8 328 18. Munoz FM, Bond NH, Maccato M, et al. Safety and immunogenicity of tetanus diphtheria and  
9 329 acellular pertussis (Tdap) immunization during pregnancy in mothers and infants. *JAMA*  
10 330 2014;311:1760.  
11  
12 331 19. Shakib JH, Korgenski K, Sheng X, Varner MW, Pavia AT, Byington CL. Tetanus, diphtheria,  
13 332 acellular pertussis vaccine during pregnancy: pregnancy and infant health outcomes. *J Pediatr*  
14 333 2013;163:1422-6.e1-4.  
15  
16 334 20. Petousis-Harris H, Jiang Y, Yu L, et al. A retrospective cohort study of safety outcomes in New  
17 335 Zealand infants exposed to Tdap vaccine in utero. *Vaccines* 2019;7:147.  
18  
19 336 21. Donegan K, King B, Bryan P. Safety of pertussis vaccination in pregnant women in UK:  
20 337 observational study. *BMJ* 2014;349:g4219.  
21  
22 338 22. Fortner KB, Edwards KM, Broder KR, et al. Reactogenicity of tetanus toxoid, reduced diphtheria  
23 339 toxoid, and acellular pertussis vaccine (Tdap) in pregnant women. *Am J Obstet Gynecol*  
24 340 2016;214:S193-S194.  
25  
26 341 23. Griffin JB, Yu L, Watson D, et al. Pertussis Immunisation in Pregnancy Safety (PIPS) Study: A  
27 342 retrospective cohort study of safety outcomes in pregnant women vaccinated with Tdap vaccine.  
28 343 *Vaccine* 2018;36:5173-9.  
29  
30 344 24. Petousis-Harris H, Walls T, Watson D, Paynter J, Graham P, Turner N. Safety of Tdap vaccine in  
31 345 pregnant women: an observational study. *BMJ Open* 2016;6:e010911.  
32  
33 346 25. Kharbanda EO, Vazquez-Benitez G, Lipkind HS, et al. Evaluation of the association of maternal  
34 347 pertussis vaccination with obstetric events and birth outcomes. *JAMA* 2014;312:1897-904.  
35  
36 348 26. Sukumaran L, McCarthy NL, Kharbanda EO, et al. Association of Tdap vaccination with acute  
37 349 events and adverse birth outcomes among pregnant women with prior tetanus-containing  
38 350 immunizations. *JAMA* 2015;314:1581-7.  
39  
40 351 27. Kharbanda EO, Vazquez-Benitez G, Lipkind HS, et al. Maternal Tdap vaccination: Coverage and  
41 352 acute safety outcomes in the vaccine safety datalink, 2007-2013. *Vaccine* 2016;34:968-73.  
42  
43 353 28. Layton JB, Butler AM, Li D, et al. Prenatal Tdap immunization and risk of maternal and newborn  
44 354 adverse events. *Vaccine* 2017;35:4072-8.  
45  
46 355 29. Talge NM, Mudd LM, Sikorskii A, Basso O. United States birth weight reference corrected for  
47 356 implausible gestational age estimates. *Pediatrics* 2014;133:844-53.  
48  
49 357 30. Basso O. Might rare factors account for most of the mortality of preterm babies? *Epidemiology*  
50 358 2012;22:320-7.  
51  
52 359 31. Kramer MS, Platt RW, Wen SW, et al. A new and improved population-based Canadian reference  
53 360 for birth weight for gestational age. *Pediatrics* 2001;108:E35.  
54  
55 361 32. Bonhoeffer J, Kochhar S, Hirschfeld S, et al. Global alignment of immunization safety assessment  
56 362 in pregnancy - The GAIA project. *Vaccine* 2016;34:5993-7.  
57  
58 363 33. Ramage K, Grabowska K, Silversides C, Quan H, Metcalfe A. Association of adult congenital  
59 364 heart disease with pregnancy, maternal, and neonatal outcomes. *JAMA Netw Open*

- 1  
2  
3 365 2019;2:e193667.  
4  
5 366 34. Lain SJ, Algert CS, Nassar N, Bowen JR, Roberts CL. Incidence of severe adverse neonatal  
6 367 outcomes: use of a composite indicator in a population cohort. *Matern Child Health J*  
7 368 2012;16:600-8.
- 8  
9 369 35. Yang D, Dalton JE. A unified approach to measuring the effect size between two groups using  
10 370 SAS®. *SAS Glob Forum 2012*. 2012:1-6.
- 11 371 36. Austin PC. An introduction to propensity score methods for reducing the effects of confounding in  
12 372 observational studies. *Multivariate Behav Res* 2011;46:399-424.
- 13  
14 373 37. Alexander GR, Kotelchuck M. Quantifying the adequacy of prenatal care: A comparison of  
15 374 indices. *Public Health Rep* 1996;111:408-19.
- 16  
17 375 38. Austin PC. A comparison of 12 algorithms for matching on the propensity score. *Stat Med*  
18 376 2014;33:1057-69.
- 19  
20 377 39. Kharbanda EO, Vazquez-Benitez G, Lipkind H, et al. Receipt of pertussis vaccine during  
21 378 pregnancy across 7 Vaccine Safety Datalink Sites. *Prev Med* 2014;67:316-9.
- 22  
23 379 40. Austin PC, Stuart EA. Moving towards best practice when using inverse probability of treatment  
24 380 weighting (IPTW) using the propensity score to estimate causal treatment effects in observational  
25 381 studies. *Stat Med* 2015;34:3661-79.
- 26  
27 382 41. Sukumaran L, McCarthy NL, Kharbanda EO, et al. Safety of tetanus toxoid, reduced diphtheria  
28 383 toxoid, and acellular pertussis and influenza vaccinations in pregnancy. *Obstet Gynecol*  
29 384 2015;126:1069-74.
- 30  
31 385 42. Hall C, Abramovitz LM, Bukowinski AT, et al. Safety of tetanus, diphtheria, and acellular  
32 386 pertussis vaccination among pregnant active duty U.S. military women. *Vaccine* 2020;38:1982-8.
- 33  
34 387 43. Marchant A, Sadarangani M, Garand M, et al. Maternal immunisation: collaborating with mother  
35 388 nature. *Lancet Infect Dis* 2017;17:e197-e208.
- 36  
37 389 44. Savitz DA, Fell DB, Ortiz JR, Bhat N. Does influenza vaccination improve pregnancy outcome?  
38 390 Methodological issues and research needs. *Vaccine* 2015;33:6430-5.
- 39  
40 391 45. Vazquez-Benitez G, Kharbanda EO, Naleway AL, et al. Risk of preterm or small-for-gestational-  
41 392 age birth after influenza vaccination during pregnancy: Caveats when conducting retrospective  
42 393 observational studies. *Am J Epidemiol* 2016;184:176-86.
- 43  
44 394 46. Public Health Agency of Canada. Publicly Funded Immunization Schedules for Ontario – August  
45 395 2011. *Canadian Immunization Guide*. Ottawa, Canada; 2011.
- 46  
47 396 48. Schwartz KL, Tu K, Wing L, et al. Validation of infant immunization billing codes in  
48 397 administrative data. *Hum Vaccin Immunother* 2015;11:1840-7.
- 49  
50 398 48. Schwartz KL, Jembere N, Campitelli MA, Buchan SA, Chung H, Kwong JC. Using physician  
49 399 billing claims from the Ontario Health Insurance Plan to determine individual influenza  
50 400 vaccination status: an updated validation study. *CMAJ Open* 2016;4:E463-E470.
- 51  
52 401 49. Szklo M, Nieto FJ. Chapter 4. Understanding Lack of Validity: Bias. In: Szklo M, Nieto FJ, eds.  
53 402 *Epidemiology Beyond the Basics*. 2nd Edition. Sudbury, MA: Jones and Bartlett Publishers;  
54 403 2007:109-50.
- 55  
56  
57  
58  
59  
60

## Obstetric and perinatal health outcomes following pertussis immunization during pregnancy in Ontario, Canada

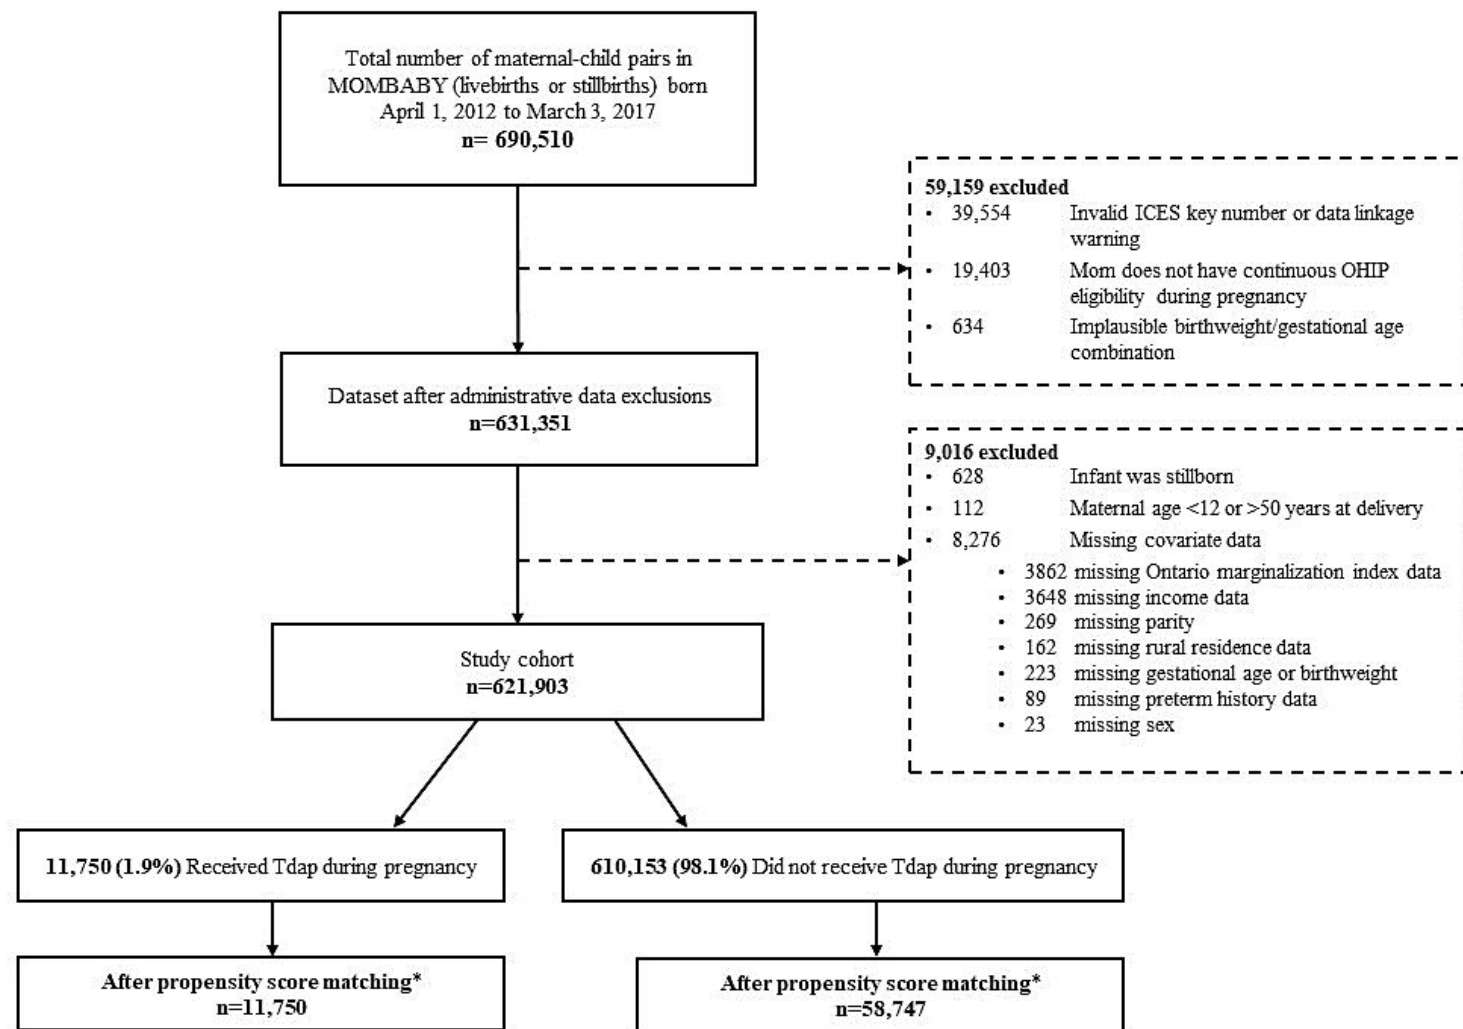

\*Note: The ratio of matched exposed to unexposed pregnancies is not exactly 1:5, as some exposed cases were matched with fewer than five unexposed cases.

Figure 1. Study flow diagram



Obstetric and perinatal health outcomes following pertussis immunization during pregnancy in Ontario, Canada

Table 1. Baseline characteristics of the cohort, before and after propensity score matching, by Tdap vaccination status

| Characteristic                        | Unmatched cohort (n=621,903)                         |                                                         |                         | Propensity score-matched cohort (n=70,497)       |                                                    |                         |
|---------------------------------------|------------------------------------------------------|---------------------------------------------------------|-------------------------|--------------------------------------------------|----------------------------------------------------|-------------------------|
|                                       | Tdap vaccinated women, N (%) <sup>a</sup> (n=11,750) | Tdap unvaccinated women, N (%) <sup>a</sup> (n=610,153) | Stand Diff <sup>b</sup> | Tdap vaccinated women, % <sup>a</sup> (n=11,750) | Tdap unvaccinated women, % <sup>a</sup> (n=58,747) | Stand Diff <sup>b</sup> |
| Gestational age at vaccination (week) |                                                      |                                                         |                         |                                                  |                                                    |                         |
| <20                                   | 2,641 (22.5)                                         | -                                                       | -                       | -                                                | -                                                  | -                       |
| 20-26                                 | 1,153 (9.8)                                          | -                                                       | -                       | -                                                | -                                                  | -                       |
| 27-32                                 | 4,903 (41.7)                                         | -                                                       | -                       | -                                                | -                                                  | -                       |
| 33+                                   | 3,053 (26.0)                                         | -                                                       | -                       | -                                                | -                                                  | -                       |
| Maternal age (years)                  |                                                      |                                                         |                         |                                                  |                                                    |                         |
| <20                                   | 179 (1.5)                                            | 14,080 (2.3)                                            | 0.06                    | 1.5                                              | 1.5                                                | 0.01                    |
| 20-24                                 | 787 (6.7)                                            | 65,615 (10.8)                                           | 0.14                    | 6.7                                              | 6.5                                                | 0.01                    |
| 25-29                                 | 3,305 (28.1)                                         | 163,942 (26.9)                                          | 0.03                    | 28.1                                             | 28.1                                               | 0                       |
| 30-34                                 | 4,659 (39.7)                                         | 223,707 (36.7)                                          | 0.06                    | 39.7                                             | 39.8                                               | 0                       |
| ≥35                                   | 2,820 (24.0)                                         | 142,809 (23.4)                                          | 0.01                    | 24.0                                             | 24.1                                               | 0                       |
| Birth year (in fiscal year)           |                                                      |                                                         |                         |                                                  |                                                    |                         |
| 2012-13                               | 594 (5.1)                                            | 127,585 (20.9)                                          | 0.49                    | 5.1                                              | 5.4                                                | 0.02                    |
| 2013-14                               | 1,628 (13.9)                                         | 124,744 (20.4)                                          | 0.18                    | 13.9                                             | 13.6                                               | 0.01                    |
| 2014-15                               | 2,099 (17.9)                                         | 123,945 (20.3)                                          | 0.06                    | 17.9                                             | 17.8                                               | 0                       |
| 2015-16                               | 2,903 (24.7)                                         | 122,767 (20.1)                                          | 0.11                    | 24.7                                             | 24.9                                               | 0.01                    |
| 2016-17                               | 4,526 (38.5)                                         | 111,112 (18.2)                                          | 0.46                    | 38.5                                             | 38.3                                               | 0.01                    |
| Parity                                |                                                      |                                                         |                         |                                                  |                                                    |                         |
| 0 (nulliparous)                       | 6,066 (51.6)                                         | 269,466 (44.2)                                          | 0.15                    | 51.6                                             | 51.7                                               | 0                       |
| ≥1 (multiparous)                      | 5,684 (48.4)                                         | 340,687 (55.8)                                          | 0.15                    | 48.4                                             | 48.3                                               | 0                       |
| Multiple birth                        |                                                      |                                                         |                         |                                                  |                                                    |                         |
| No                                    | 11,474 (97.7)                                        | 589,055 (96.5)                                          | 0.07                    | 97.7                                             | 97.8                                               | 0.01                    |
| Yes                                   | 276 (2.3)                                            | 21,098 (3.5)                                            | 0.07                    | 2.3                                              | 2.2                                                | 0.01                    |
| Baby's sex                            |                                                      |                                                         |                         |                                                  |                                                    |                         |
| Female                                | 5,706 (48.6)                                         | 297,283 (48.7)                                          | 0                       | 48.6                                             | 48.8                                               | 0                       |
| Male                                  | 6,044 (51.4)                                         | 312,870 (51.3)                                          | 0                       | 51.4                                             | 51.2                                               | 0                       |
| History of preterm birth              |                                                      |                                                         |                         |                                                  |                                                    |                         |
| Nulliparous                           | 6,066 (51.6)                                         | 269,466 (44.2)                                          | 0.15                    | 51.6                                             | 51.7                                               | 0                       |

## Obstetric and perinatal health outcomes following pertussis immunization during pregnancy in Ontario, Canada

|                                                      |               |                |      |      |      |      |
|------------------------------------------------------|---------------|----------------|------|------|------|------|
| Parous – no history of preterm birth                 | 5,352 (45.5)  | 316,038 (51.8) | 0.13 | 45.5 | 44.8 | 0.01 |
| Parous – history of preterm birth                    | 332 (2.8)     | 24,649 (4.0)   | 0.07 | 2.8  | 3.5  | 0.04 |
| Pre-existing maternal medical condition <sup>c</sup> |               |                |      |      |      |      |
| No                                                   | 11,399 (97.0) | 592,496 (97.1) | 0.01 | 97.0 | 97.1 | 0    |
| Yes                                                  | 351 (3.0)     | 17,657 (2.9)   | 0.01 | 3.0  | 2.9  | 0    |
| Type of pre-existing maternal medical condition      |               |                |      |      |      |      |
| Asthma                                               | 25 (0.2)      | 1,508 (0.2)    | 0.01 | 0.2  | 0.2  | 0    |
| Chronic hypertension                                 | 41 (0.3)      | 2,327 (0.4)    | 0.01 | 0.3  | 0.3  | 0    |
| Diabetes                                             | 55(0.5)       | 4,779(0.8)     | 0.01 | 0.5  | 0.5  | 0    |
| Heart disease                                        | 51 (0.4)      | 2,986 (0.5)    | 0.01 | 0.4  | 0.4  | 0    |
| Thyroid disease                                      |               |                |      |      |      |      |
| No                                                   | 11,548 (98.3) | 602,995 (98.8) | 0.05 | 98.3 | 98.3 | 0    |
| Yes                                                  | 202 (1.7)     | 7,158 (1.2)    | 0.05 | 1.7  | 1.7  | 0    |
| Obstetrical complication <sup>d</sup>                |               |                |      |      |      |      |
| No                                                   | 9,096 (77.4)  | 482,522 (79.1) | 0.04 | 77.4 | 78.7 | 0.02 |
| Yes                                                  | 2,654 (22.6)  | 127,631 (20.9) | 0.04 | 22.6 | 21.3 | 0.02 |
| Type of obstetrical complication <sup>e</sup>        |               |                |      |      |      |      |
| Preeclampsia and eclampsia                           | 247 (2.1)     | 11,839 (1.9)   | 0.01 | 2.1  | 2.1  | 0    |
| Gestational diabetes                                 | 771 (6.6)     | 38,483 (6.3)   | 0.01 | 6.6  | 6.5  | 0    |
| Placenta previa                                      | 82 (0.7)      | 4,369 (0.7)    | 0.01 | 0.7  | 0.7  | 0    |
| Placental abruption                                  | 112 (1.0)     | 6,253 (1.0)    | 0.01 | 1.0  | 0.9  | 0    |
| PROM                                                 | 1,599 (13.6)  | 74,941 (12.3)  | 0.04 | 13.6 | 12.5 | 0.3  |
| Type of delivery                                     |               |                |      |      |      |      |
| Vaginal                                              | 8,558 (72.8)  | 434,154 (71.2) | 0.04 | 72.8 | 70.7 | 0.04 |
| Cesarean                                             | 3,192 (27.2)  | 175,999 (28.8) | 0.04 | 27.2 | 29.3 | 0.04 |
| Previous cesarean delivery                           |               |                |      |      |      |      |
| Nulliparous                                          | 6,066 (51.6)  | 269,466 (44.2) | 0.15 | 51.6 | 51.7 | 0    |

**Obstetric and perinatal health outcomes following pertussis immunization during pregnancy in Ontario, Canada**

|                                             |               |                |      |      |      |      |
|---------------------------------------------|---------------|----------------|------|------|------|------|
| Parous – no previous cesarean section       | 4,615 (39.3)  | 271,605 (44.5) | 0.11 | 39.3 | 37.9 | 0.03 |
| Parous – previous cesarean section          | 1,069 (9.1)   | 69,082 (11.3)  | 0.07 | 9.1  | 10.4 | 0.04 |
| UTI during pregnancy                        | 10 (0.1)      | 1,068 (0.2)    | 0.02 | 0.1  | 0.1  | 0    |
| Neighborhood median family income quintiles |               |                |      |      |      |      |
| 1 (Lowest)                                  | 2,030 (17.3)  | 126,778 (20.8) | 0.09 | 17.3 | 17.2 | 0    |
| 2                                           | 2,377 (20.2)  | 122,298 (20.0) | 0    | 20.2 | 20.3 | 0    |
| 3                                           | 2,297 (19.5)  | 124,419 (20.4) | 0.02 | 19.5 | 19.4 | 0    |
| 4                                           | 2,624 (22.3)  | 134,002 (22.0) | 0.01 | 22.3 | 22.7 | 0.01 |
| 5 (Highest)                                 | 2,422 (20.6)  | 102,656 (16.8) | 0.11 | 20.6 | 20.4 | 0.01 |
| Rural residence                             |               |                |      |      |      |      |
| No                                          | 10,666 (90.8) | 550,396 (90.2) | 0.02 | 90.8 | 90.7 | 0    |
| Yes                                         | 1,084 (9.2)   | 59,757 (9.8)   | 0.02 | 9.2  | 9.3  | 0    |
| Public health unit region                   |               |                |      |      |      |      |
| North West                                  | 114 (1.0)     | 8,823 (1.4)    | 0.04 | 1.0  | 1.0  | 0    |
| North East                                  | 286 (2.4)     | 23,203 (3.8)   | 0.08 | 2.4  | 2.4  | 0    |
| Eastern                                     | 1,905 (16.2)  | 76,058 (12.5)  | 0.11 | 16.2 | 16.1 | 0    |
| Central East                                | 4,240 (36.1)  | 185,512 (30.4) | 0.12 | 36.1 | 36.1 | 0    |
| Toronto                                     | 3,439 (29.3)  | 126,977 (20.8) | 0.20 | 29.3 | 29.4 | 0    |
| South West                                  | 521 (4.4)     | 68,837 (11.3)  | 0.26 | 4.4  | 4.3  | 0.01 |
| Central West                                | 1,245 (10.6)  | 120,743 (19.8) | 0.26 | 10.6 | 10.7 | 0    |
| Birth weight                                |               |                |      |      |      |      |
| <1500 g                                     | 48 (0.4)      | 6,081 (1.0)    | 0.07 | 0.4  | 0.9  | 0.06 |
| 1500-2500 g                                 | 533 (4.5)     | 33,998 (5.6)   | 0.05 | 4.5  | 5.3  | 0.03 |
| 2500-3500 g                                 | 6,575 (56.0)  | 330,647 (54.2) | 0.04 | 56.0 | 56.2 | 0    |
| ≥3500 g                                     | 4,594 (39.1)  | 239,427 (39.2) | 0    | 39.1 | 37.6 | 0.01 |
| Gestational weeks at delivery               |               |                |      |      |      |      |
| <28                                         | 9 (0.1)       | 2,717 (0.4)    | 0.07 | 0.1  | 0.4  | 0.06 |
| 28-31                                       | 50 (0.4)      | 4,145 (0.7)    | 0.03 | 0.4  | 0.6  | 0.02 |
| 32-33                                       | 62 (0.5)      | 5,725 (0.9)    | 0.05 | 0.5  | 0.8  | 0.03 |
| 34                                          | 82 (0.7)      | 6,006 (1.0)    | 0.03 | 0.7  | 0.9  | 0.02 |

## Obstetric and perinatal health outcomes following pertussis immunization during pregnancy in Ontario, Canada

|                                      |               |                |      |      |      |      |
|--------------------------------------|---------------|----------------|------|------|------|------|
| 35                                   | 154 (1.3)     | 9,919 (1.6)    | 0.03 | 1.3  | 1.5  | 0.02 |
| 36                                   | 352 (3.0)     | 19,902 (3.3)   | 0.02 | 3.0  | 3.1  | 0.01 |
| ≥37                                  | 11,041 (94.0) | 561,739 (92.1) | 0.07 | 94.0 | 92.6 | 0.05 |
| Maternal world region of origin      |               |                |      |      |      |      |
| North America                        | 9,075 (77.2)  | 477,882 (78.3) | 0.03 | 77.2 | 77.6 | 0.01 |
| Asia                                 | 2,090 (17.8)  | 83,018 (13.6)  | 0.12 | 17.8 | 17.6 | 0.01 |
| Europe                               | 163 (1.4)     | 12,060 (2.0)   | 0.05 | 1.4  | 1.3  | 0.01 |
| Africa                               | 157 (1.3)     | 11,512 (1.9)   | 0.04 | 1.3  | 1.3  | 0.01 |
| Caribbean                            | 73 (0.6)      | 8,224 (1.3)    | 0.07 | 0.6  | 0.6  | 0.01 |
| Yugoslavia & USSR                    | 89 (0.8)      | 7,684 (1.3)    | 0.05 | 0.8  | 0.8  | 0    |
| South America                        | 69 (0.6)      | 6,428 (1.1)    | 0.05 | 0.6  | 0.6  | 0    |
| Central America                      | 25 (0.2)      | 3,059 (0.5)    | 0.05 | 0.2  | 0.2  | 0    |
| Oceania                              | 9 (0.1)       | 286 (0.0)      | 0.01 | 0.1  | 0.1  | 0    |
| Marginalization Indices <sup>f</sup> |               |                |      |      |      |      |
| Residential instability quintile     |               |                |      |      |      |      |
| 1                                    | 2,574 (21.9)  | 138,078 (22.6) | 0.02 | 21.9 | 22.2 | 0.01 |
| 2                                    | 2,205 (18.8)  | 118,780 (19.5) | 0.02 | 18.8 | 19.3 | 0.01 |
| 3                                    | 2,181 (18.6)  | 113,027 (18.5) | 0    | 18.6 | 18.1 | 0.01 |
| 4                                    | 2,153 (18.3)  | 115,549 (18.9) | 0.02 | 18.3 | 18.6 | 0.01 |
| 5                                    | 2,637 (22.4)  | 124,719 (20.4) | 0.05 | 22.4 | 21.9 | 0.01 |
| Material deprivation quintile        |               |                |      |      |      |      |
| 1                                    | 2,000 (17.0)  | 94,889 (15.6)  | 0.04 | 17.0 | 16.7 | 0.01 |
| 2                                    | 2,267 (19.3)  | 116,036 (19.0) | 0.01 | 19.3 | 20.1 | 0.02 |
| 3                                    | 2,358 (20.1)  | 120,708 (19.8) | 0.01 | 20.1 | 20.6 | 0.01 |
| 4                                    | 2,456 (20.9)  | 126,083 (20.7) | 0.01 | 20.9 | 21.4 | 0.01 |
| 5                                    | 2,669 (22.7)  | 152,437 (25.0) | 0.05 | 22.7 | 21.2 | 0.04 |
| Dependency quintile                  |               |                |      |      |      |      |
| 1                                    | 3,861 (32.9)  | 212,799 (34.9) | 0.04 | 32.9 | 35.3 | 0.04 |
| 2                                    | 2,426 (20.6)  | 122,966 (20.2) | 0.01 | 20.6 | 19.8 | 0.02 |
| 3                                    | 2,105 (17.9)  | 105,041 (17.2) | 0.02 | 17.9 | 16.8 | 0.03 |
| 4                                    | 1,772 (15.1)  | 91,485 (15.0)  | 0    | 15.1 | 14.4 | 0.02 |
| 5                                    | 1,586 (13.5)  | 77,862 (12.8)  | 0.02 | 13.5 | 13.7 | 0.01 |

**Obstetric and perinatal health outcomes following pertussis immunization during pregnancy in Ontario, Canada**

| Ethnic concentration quintile    |              |                |      |      |      |      |
|----------------------------------|--------------|----------------|------|------|------|------|
| 1                                | 1,479 (12.6) | 85,842 (14.1)  | 0.04 | 12.6 | 12.1 | 0.02 |
| 2                                | 1,702 (14.5) | 90,458 (14.8)  | 0.01 | 14.5 | 12.6 | 0.05 |
| 3                                | 1,939 (16.5) | 102,531 (16.8) | 0.01 | 16.5 | 16.2 | 0.01 |
| 4                                | 2,361 (20.1) | 126,466 (20.7) | 0.02 | 20.1 | 22.5 | 0.02 |
| 5                                | 4,269 (36.3) | 204,856 (33.6) | 0.06 | 36.3 | 36.7 | 0.01 |
| Prenatal care index <sup>g</sup> |              |                |      |      |      |      |
| Intensive                        | 247 (2.1)    | 8,933 (1.5)    | 0.05 | 2.1  | 2.0  | 0.01 |
| Adequate                         | 4,493 (38.2) | 162,460 (26.6) | 0.25 | 38.2 | 38.5 | 0    |
| Intermediate                     | 5,780 (49.2) | 302,356 (49.6) | 0.01 | 49.2 | 49.3 | 0    |
| Inadequate                       | 898 (7.6)    | 86,139 (14.1)  | 0.21 | 7.6  | 7.4  | 0.01 |
| No care                          | 332 (2.8)    | 50,265 (8.2)   | 0.24 | 2.8  | 2.8  | 0    |

Abbreviations: IPTW, inverse probability of treatment weighting; Stand diff, standardized difference; PROM, premature rupture of membranes.

<sup>a</sup> Column Percentages.

<sup>b</sup> Absolute standardized differences. Shaded cells indicate an imbalance (>0.10) between Tdap-vaccinated and unvaccinated women.

<sup>c</sup> Conditions included: Asthma, chronic hypertension, diabetes, heart disease.

<sup>d</sup> Complications included: Preeclampsia and eclampsia, gestational diabetes, placenta previa, placental abruption, PROM.

<sup>e</sup> Obstetrical complication categories are not mutually exclusive.

<sup>f</sup> 1= least marginalized; 5=most marginalized

<sup>g</sup> Adequacy of prenatal care characterized using the Revised-Graduated Prenatal Care Utilization Index (R-GINDEX).

## Obstetric and perinatal health outcomes following pertussis immunization during pregnancy in Ontario, Canada

**Table 2. Association between receipt of Tdap vaccination during pregnancy and obstetrical and perinatal outcomes**

| Outcome                                      | Unmatched Cohort Analysis (n=621,903) |                               |                                 | Propensity Score-Matched Analysis (n=70,497) |                              |                                    |
|----------------------------------------------|---------------------------------------|-------------------------------|---------------------------------|----------------------------------------------|------------------------------|------------------------------------|
|                                              | Tdap Vaccinated (n=11,750)            | Tdap Unvaccinated (n=610,153) | Crude Estimate (RR/HR [95% CI]) | Tdap Vaccinated (n=11,750)                   | Tdap Unvaccinated (n=58,747) | Adjusted Estimate (RR/HR [95% CI]) |
|                                              | N (%)                                 | N (%)                         |                                 | N (%)                                        | N (%)                        |                                    |
| Chorioamnionitis <sup>a</sup>                | 145 (1.23)                            | 6,069 (0.99)                  | 1.24 (1.05,1.46)                | 145 (1.23)                                   | 741 (1.26)                   | 0.98 (0.82,1.17)                   |
| Gestational hypertension <sup>a</sup>        | 399 (3.40)                            | 23,698 (3.88)                 | 0.87 (0.79,0.96)                | 399 (3.40)                                   | 2,434 (4.14)                 | 0.82 (0.74,0.91)                   |
| Postpartum hemorrhage <sup>a</sup>           | 324 (2.76)                            | 16,804 (2.75)                 | 1.00 (0.90, 1.12)               | 324 (2.76)                                   | 1,561 (2.66)                 | 1.04 (0.92, 1.17)                  |
| Severe postpartum hemorrhage <sup>a, b</sup> | 30 (0.26)                             | 1,974 (0.32)                  | 0.79 (0.55, 1.13)               | 30 (0.26)                                    | 170 (0.29)                   | 0.88 (0.60, 1.30)                  |
| Small-for-gestational-age birth <sup>a</sup> | 1,089 (9.27)                          | 59,697 (9.78)                 | 0.95 (0.89,1.00)                | 1,089 (9.27)                                 | 5,991 (10.20)                | 0.91 (0.85,0.97)                   |
| NICU admission >24 hours <sup>a</sup>        | 759 (6.46)                            | 50,676 (8.31)                 | 0.78 (0.73,0.83)                | 759 (6.46)                                   | 4,496 (7.65)                 | 0.84 (0.78,0.91)                   |
| NAOI composite outcome <sup>a</sup>          | 670 (5.70)                            | 44,717 (7.33)                 | 0.78 (0.72,0.84)                | 670 (5.70)                                   | 4,240 (7.22)                 | 0.79 (0.73,0.86)                   |
| Preterm birth, <37 weeks <sup>c,d</sup>      | 709 (6.03)                            | 48,414 (7.93)                 | 0.94 (0.87,1.01)                | 709 (6.03)                                   | 4,328 (7.37)                 | 0.95 (0.89,1.02)                   |
| Very preterm birth, <32 weeks <sup>c,d</sup> | 59 (0.50)                             | 6,862 (1.12)                  | 1.06 (0.82,1.37)                | 59 (0.50)                                    | 595 (1.01)                   | 1.15 (0.89,1.47)                   |

Abbreviations: CI, confidence interval; RR, risk ratio; HR, hazard ratio; NICU, neonatal intensive care unit; NAOI, neonatal adverse outcome indicator.

<sup>a</sup> Estimate values represent the risk ratios (RRs) that were estimated using a log-binomial regression model.

<sup>b</sup> Postpartum hemorrhage in conjunction with a procedure code for hysterectomy, blood transfusion, or other procedures to control bleeding.

<sup>c</sup> Estimate values represent the hazard ratios (HR) that were estimated using a time-dependent Cox model, where Tdap vaccination was modelled as a time-varying exposure.

<sup>d</sup> We limited analyses to Tdap administration at 36 weeks' gestation or earlier (N=69,620) and 31 weeks' or earlier (N=65,824) for preterm birth outcome and very preterm outcome respectively.

# Obstetric and perinatal health outcomes following pertussis immunization during pregnancy in Ontario, Canada

## SUPPLEMENTARY MATERIALS:

**Table A: Description & purpose of each data source utilized in the study**

| Database                                                                         | Description                                                                                                                                                                                                                                                                                                                                                        | Information collected                                                                                                                                                                                                                                                                                                                     |
|----------------------------------------------------------------------------------|--------------------------------------------------------------------------------------------------------------------------------------------------------------------------------------------------------------------------------------------------------------------------------------------------------------------------------------------------------------------|-------------------------------------------------------------------------------------------------------------------------------------------------------------------------------------------------------------------------------------------------------------------------------------------------------------------------------------------|
| MOMBABY Database                                                                 | Contains inpatient admission records of delivering mothers and their respective newborns (including stillbirths), which are linked by a unique matching identifier on each hospitalization record. This administrative dataset, maintained and annually updated at ICES, links approximately 98% of maternal-infant records for in-hospital deliveries in Ontario. | This database was used to assemble our study cohort, as well as collect maternal and newborn information such as gestational age at birth, maternal age, birth weight, baby’s sex, parity and plurality.                                                                                                                                  |
| Registered Persons Database (RPDB)                                               | Demographic repository containing information on all Ontario residents eligible for publicly funded health care in the province.                                                                                                                                                                                                                                   | Was used to establish the duration for which each participant was eligible to receive health care services, as well as obtain demographic information regarding neighbourhood income quintiles and region of residence.                                                                                                                   |
| Canadian Institute for Health Information Discharge Abstract Database (CIHI-DAD) | Captures demographic and clinical information regarding hospital admissions from all acute care institutions throughout Canada.                                                                                                                                                                                                                                    | We used this database to collect information from both the mothers and newborns regarding medical diagnoses (e.g., gestational diabetes), interventions (e.g., neonatal ventilatory support), number of previous preterm deliveries, as well as admissions and discharges to any special care units (e.g., neonatal intensive care unit). |
| Ontario Health Insurance Plan (OHIP) Database                                    | Contains health care billing information made by physicians, or other health care providers, for service reimbursement. This database includes information on the diagnosis (i.e., reason for the visit), type of service received, and the associated billing code.                                                                                               | Specific OHIP fee codes are used when a vaccine is administered, which provided the information to identify our exposure group. In addition, we identified prenatal care visits (via OHIP fee codes) and health care provider specialties (via SPEC variable) through from this database.                                                 |



## Obstetric and perinatal health outcomes following pertussis immunization during pregnancy in Ontario, Canada

|                                                                                             |                                                                                                                                                                                                                                                                                                                                                                                                                                                                                                                          |                                                                      |
|---------------------------------------------------------------------------------------------|--------------------------------------------------------------------------------------------------------------------------------------------------------------------------------------------------------------------------------------------------------------------------------------------------------------------------------------------------------------------------------------------------------------------------------------------------------------------------------------------------------------------------|----------------------------------------------------------------------|
| Ontario Marginalization Index (ON-Marg)                                                     | Data tool that quantifies the level of marginalization occurring in Ontario. This multifaceted index uses data from Statistics Canada's Census and consists of four dimensions that indicate marginalization: residential instability, material deprivation, dependency and ethnic concentration. Scores corresponding to each of these four dimensions were previously divided into quintiles, where quintile 1 represents areas that are the least marginalized and quintile 5 represents the most marginalized areas. | Collected information regarding the four indices of marginalization. |
| Permanent Resident Database (PRD) led by Immigration, Refugee and Citizenship Canada (IRCC) | Contains records of permanent residents that immigrated to Canada.                                                                                                                                                                                                                                                                                                                                                                                                                                                       | Was used to collect information regarding maternal country of birth. |

**Obstetric and perinatal health outcomes following pertussis immunization during pregnancy in Ontario, Canada**

**Table B. Study outcome definitions and diagnostic codes**

| Study Outcome                         | Definition                                                                                                                                                                | Data source, ICD10 Diagnostic Code, and/or CCI procedure code                       |
|---------------------------------------|---------------------------------------------------------------------------------------------------------------------------------------------------------------------------|-------------------------------------------------------------------------------------|
| <b>Obstetrical Outcomes</b>           |                                                                                                                                                                           |                                                                                     |
| Gestational hypertension              | Hypertension in pregnant women (blood pressure >140/90mmHg) after 20 weeks of gestation without presence of proteinuria or preeclampsia.                                  | O13, O16                                                                            |
| Chorioamnionitis                      | Acute inflammation of the chorion and membranes of the placenta due to bacterial infection.                                                                               | O41.12, O41.13, O41.19                                                              |
| Postpartum hemorrhage                 | Blood loss of ≥ 500 mL following vaginal delivery or ≥ 1000 mL following Caesarean section, or diagnosis as noted by a health care provider.                              | O720-O723                                                                           |
| Severe postpartum hemorrhage          | Postpartum hemorrhage in conjunction with one of the following procedures to control bleeding: blood transfusion, hysterectomy, and other procedures to control bleeding. |                                                                                     |
| -Hysterectomy                         |                                                                                                                                                                           | 5MD60KE; 5MD60RC; 5MD60CB; 5MD60RD; 1RM87LAGX; (1RM89LA without 1PL74;1RS80; 1RS74) |
| -Other procedures to control bleeding |                                                                                                                                                                           | 5PC91LA, 1RM13, 1KT51;5PC91HT                                                       |
| -Blood transfusion                    |                                                                                                                                                                           | Measured using DAD variable: BTANY.                                                 |
| <b>Perinatal Outcomes</b>             |                                                                                                                                                                           |                                                                                     |
| Small-for-gestational-age birth       | Birth weight <10th percentile for gestational age and sex.                                                                                                                | Measured using infant sex, gestational age, and birth weight variables in MOMBABY.  |

## Obstetric and perinatal health outcomes following pertussis immunization during pregnancy in Ontario, Canada

|                          |                                                                                                                                                                      |                                                                                                     |
|--------------------------|----------------------------------------------------------------------------------------------------------------------------------------------------------------------|-----------------------------------------------------------------------------------------------------|
| NICU Admission >24 hours | Intensive care unit admission lasting >24 hours                                                                                                                      | Measured using DAD variables (special care unit admission and discharge dates) from infant records. |
| NAOI composite outcome   | The NAOI is a validated composite outcome that will be utilized to identify neonatal morbidity. It combined ICD-based codes relating to treatments of severe events. | Refer to <b>Appendix III</b> for a complete list of the diagnostic and procedural codes included.   |
| Preterm birth            | Live birth prior to 37 weeks of gestation.                                                                                                                           | Measured using gestational age variable in MOMBABY.                                                 |
| Very preterm birth       | Live birth prior to 32 weeks of gestation.                                                                                                                           | Measured using gestational age variable in MOMBABY.                                                 |

Confidential

**Obstetric and perinatal health outcomes following pertussis immunization during pregnancy in Ontario, Canada**

**Table C. Components of the Neonatal Adverse Outcome Indicator (NAOI) composite outcome**

| Components of Variable                                                                                      | MOMBABY Variable                 | DAD Variable | Diagnosis Code (ICD-10)                           |
|-------------------------------------------------------------------------------------------------------------|----------------------------------|--------------|---------------------------------------------------|
| Gestational age <32 weeks                                                                                   | B_GESTWKS_DEL (or M_GESTWKS_DEL) |              |                                                   |
| Birth weight <1500grams                                                                                     | B_WEIGHT                         |              |                                                   |
| Respiratory distress syndrome                                                                               |                                  |              | P22.0                                             |
| Seizures                                                                                                    |                                  |              | P90, R56                                          |
| Intraventricular hemorrhage (grades 2,3, or 4)                                                              |                                  |              | P52.1, P52.2                                      |
| Cerebral infarction                                                                                         |                                  |              | I63                                               |
| Periventricular leukomalacia                                                                                |                                  |              | P91.2                                             |
| Birth trauma (intracranial hemorrhage paralysis due to brachial plexus injury, skull or long bone fracture) |                                  |              | P10.0 to P10.3, P13.0, P13.2, P13.3, P14.0, P14.1 |
| Hypoxic ischemic encephalopathy                                                                             |                                  |              | P91.5, P91.81, P91.6                              |
| Necrotizing enterocolitis                                                                                   |                                  |              | P77                                               |
| Bronchopulmonary dysplasia                                                                                  |                                  |              | P27.1                                             |
| Sepsis/septicemia                                                                                           |                                  |              | P36, A40, A41.5, A41.9, B95.1, B96.2              |
| Pneumonia                                                                                                   |                                  |              | P23, J12 to J18                                   |

## Obstetric and perinatal health outcomes following pertussis immunization during pregnancy in Ontario, Canada

|                                                          |                         |                     |                             |
|----------------------------------------------------------|-------------------------|---------------------|-----------------------------|
| Primary atelectasis                                      |                         |                     | P28.0                       |
| Respiratory failure                                      |                         |                     | P28.5                       |
|                                                          | <b>MOMBABY Variable</b> | <b>DAD Variable</b> | <b>Procedure code (CCI)</b> |
| Resuscitation                                            |                         |                     | 1.GZ.30                     |
| Ventilatory support (mechanical ventilation and/or CPAP) |                         |                     | 1.GZ.31                     |
| Central venous or arterial catheter                      |                         |                     | 1.IS.53, 1.KV.53            |
| Transfusion of blood or blood products                   |                         | BTANY, BTOTHER      |                             |
| Pneumothorax requiring an intercostal catheter           |                         |                     | 1.GT.33                     |

### Obstetric and perinatal health outcomes following pertussis immunization during pregnancy in Ontario, Canada

**Table D. Baseline characteristics included in propensity score model**

| <b>Variables included</b>                                                                                                                                                      |
|--------------------------------------------------------------------------------------------------------------------------------------------------------------------------------|
| Maternal age (continuous variable)                                                                                                                                             |
| Parity                                                                                                                                                                         |
| Multiple birth                                                                                                                                                                 |
| Baby's sex                                                                                                                                                                     |
| Pre-existing maternal medical conditions (chronic hypertension, diabetes, asthma, heart disease, thyroid disease)                                                              |
| Obstetrical complications (placenta previa, placental abruption, preeclampsia, eclampsia, gestational diabetes, PROM)                                                          |
| UTI during pregnancy                                                                                                                                                           |
| Fiscal year of delivery                                                                                                                                                        |
| Maternal world region of birth                                                                                                                                                 |
| Marginalization indices from Ontario Marginalization (ONMARG) database (residential instability, material deprivation, dependency, ethnic concentration) (continuous variable) |
| Rural residency                                                                                                                                                                |
| Neighborhood income quintile                                                                                                                                                   |
| Public health unit region of residence                                                                                                                                         |
| Revised Graduated Adequacy of Prenatal Care Index (R-GINDEX) (6 categories of prenatal care: inadequate, intermediate, adequate, intensive, no care, and missing)              |

## Obstetric and perinatal health outcomes following pertussis immunization during pregnancy in Ontario, Canada

**Table E. OHIP fee codes associated with a prenatal visit**

| OHIP fee code | Description                                                          |
|---------------|----------------------------------------------------------------------|
| A920          | Medical management of early pregnancy, initial visit                 |
| A921          | Medical management of early pregnancy, subsequent visit              |
| A005          | Consultation                                                         |
| A006          | Re-consultation                                                      |
| A665          | Prenatal consult                                                     |
| Q606          | Prenatal care - gen. Assess - major prenatal visit                   |
| Q607          | Prenatal care - min. Assess - subsequent prenatal visit              |
| P002          | High risk prenatal assessment                                        |
| P003          | Obs.-prenatal care-general assess - major prenatal visit             |
| P004          | Obs.-prenatal care-minor prenatal assess - subsequent prenatal visit |
| P005          | Antenatal health screen                                              |

\* Prenatal visits were defined by limiting to one record per person per type of doctor per day. Only visits with an associated OHIP fee code related to prenatal care were included in this definition.



**Obstetric and perinatal health outcomes following pertussis immunization during pregnancy in Ontario, Canada**

**Table F. Association between receipt of Tdap (main exposure + possible Tdap) vaccination during pregnancy and obstetrical and perinatal outcomes using propensity-score matching**

| Outcome                                      | Unmatched Cohort Analysis (n=621,903) |                               |                                 | Propensity Score-Matched Analysis (n=87,565) |                              |                                    |
|----------------------------------------------|---------------------------------------|-------------------------------|---------------------------------|----------------------------------------------|------------------------------|------------------------------------|
|                                              | Tdap Vaccinated (n=14,595)            | Tdap Unvaccinated (n=607,308) | Crude Estimate (RR/HR [95% CI]) | Tdap Vaccinated (n=14,595)                   | Tdap Unvaccinated (n=72,970) | Adjusted Estimate (RR/HR [95% CI]) |
|                                              | N (%)                                 | N (%)                         |                                 | N (%)                                        | N (%)                        |                                    |
| Chorioamnionitis <sup>a</sup>                | 184 (1.26)                            | 6,030 (0.99)                  | 1.27 (1.10,1.47)                | 184 (1.26)                                   | 899 (1.23)                   | 1.02 (0.87, 1.20)                  |
| Gestational hypertension <sup>a</sup>        | 506 (3.47)                            | 23,591 (3.88)                 | 0.89 (0.82,0.97)                | 506 (3.47)                                   | 2,897 (3.97)                 | 0.87 (0.80, 0.96)                  |
| Postpartum hemorrhage <sup>a</sup>           | 403 (2.76)                            | 16,725                        | 1.00 (0.91, 1.11)               | 403 (2.76)                                   | 1,932 (2.65)                 | 1.04 (0.94, 1.16)                  |
| Severe post-partum hemorrhage <sup>a,b</sup> | 41 (0.28)                             | 1,963 (0.32)                  | 0.87 (0.64, 1.18)               | 41 (0.28)                                    | 220 (0.30)                   | 0.93 (0.67, 1.30)                  |
| Small-for-gestational-age birth <sup>a</sup> | 1,381 (9.46)                          | 59,405 (9.78)                 | 0.97 (0.92,1.02)                | 1,381 (9.46)                                 | 7,324 (10.0)                 | 0.94 (0.89, 1.01)                  |
| NICU admission >24 hours <sup>a</sup>        | 962 (6.59)                            | 50,473 (8.31)                 | 0.79 (0.75,0.84)                | 962 (6.59)                                   | 5,645 (7.74)                 | 0.85 (0.80, 0.91)                  |
| NAOI composite outcome <sup>a</sup>          | 858 (5.88)                            | 44,529 (7.33)                 | 0.80 (0.75,0.86)                | 858 (5.88)                                   | 5,341 (7.32)                 | 0.80 (0.75, 0.86)                  |
| Preterm birth, <37 weeks <sup>c,d</sup>      | 901 (6.17)                            | 48,222 (7.94)                 | 0.94 (0.88,1.00)                | 901 (6.17)                                   | 5,409 (7.41)                 | 0.94 (0.89, 1.01)                  |
| Very preterm birth, <32 weeks <sup>c,d</sup> | 83 (0.57)                             | 6,838 (1.13)                  | 1.09 (0.88,1.34)                | 83 (0.57)                                    | 724 (0.99)                   | 1.18 (0.96, 1.46)                  |

Abbreviations: CI, confidence interval; RR, risk ratio; HR, hazard ratio; NICU, neonatal intensive care unit; NAOI, neonatal adverse outcome indicator.

<sup>a</sup> Estimate values represent the risk ratios (RRs) that were estimated using a log-binomial regression model.

<sup>b</sup> Postpartum hemorrhage in conjunction with a procedure code for hysterectomy, blood transfusion, or other procedures to control bleeding.

<sup>c</sup> Estimate values represent the hazard ratios (HR) that were estimated using a time-dependent Cox model, where Tdap vaccination was modelled as a time-varying exposure.

<sup>d</sup> We limited analyses to Tdap administration at 36 weeks' gestation or earlier (N=86,577) and 31 weeks' or earlier (N=82,424) for preterm birth outcome and very preterm outcome respectively.

## Obstetric and perinatal health outcomes following pertussis immunization during pregnancy in Ontario, Canada

**Table G. Additional sensitivity analyses for association between Tdap vaccination during pregnancy and obstetrical and perinatal outcomes**

|                                              | Original Propensity Score Matched Results                      | Maternal Outpatient Visits (6 months before pregnancy)           | Maternal Non-Obstetric Hospitalization (2 years before pregnancy) | Propensity Score Weighting                                     |
|----------------------------------------------|----------------------------------------------------------------|------------------------------------------------------------------|-------------------------------------------------------------------|----------------------------------------------------------------|
|                                              | Adjusted estimate (RR/HR [95% CI]) <sup>a</sup><br>(n=621,903) | Adjusted estimate (RR/HR [95% CI]) <sup>a,b</sup><br>(n=609,916) | Adjusted estimate (RR/HR [95% CI]) <sup>a,c</sup><br>(n=579,768)  | Adjusted estimate (RR/HR [95% CI]) <sup>d</sup><br>(n=621,903) |
| <b>Obstetrical Outcomes</b>                  |                                                                |                                                                  |                                                                   |                                                                |
| Chorioamnionitis <sup>e</sup>                | 0.98 (0.82,1.17)                                               | 0.94 (0.78, 1.12)                                                | 0.98 (0.82, 1.18)                                                 | 0.95 (0.79,1.14)                                               |
| Gestational hypertension <sup>e</sup>        | 0.82 (0.74,0.91)                                               | 0.84 (0.75, 0.93)                                                | 0.83 (0.75, 0.93)                                                 | 0.81 (0.73,0.89)                                               |
| Postpartum hemorrhage                        | 1.04 (0.92, 1.17)                                              | 1.02 (0.91, 1.15)                                                | 0.98 (0.86, 1.10)                                                 | 1.03 (0.93,1.14)                                               |
| Severe postpartum hemorrhage                 | 0.88 (0.60, 1.30)                                              | 0.78 (0.52, 1.16)                                                | 0.70 (0.46, 1.05)                                                 | 0.98 (0.71, 1.34)                                              |
| <b>Perinatal Outcomes</b>                    |                                                                |                                                                  |                                                                   |                                                                |
| Small-for-gestational-age birth <sup>e</sup> | 0.91 (0.85,0.97)                                               | 0.89 (0.84, 0.95)                                                | 0.91 (0.85, 0.97)                                                 | 0.96 (0.91,1.01)                                               |
| NICU admission >24 hours <sup>e</sup>        | 0.84 (0.78,0.91)                                               | 0.85 (0.79, 0.92)                                                | 0.86 (0.80, 0.93)                                                 | 0.98 (0.92,1.04)                                               |
| NAOI composite outcome <sup>e</sup>          | 0.79 (0.73,0.86)                                               | 0.79 (0.73, 0.85)                                                | 0.78 (0.72, 0.85)                                                 | 0.86 (0.80,0.92)                                               |
| Preterm birth, <37 weeks <sup>f</sup>        | 0.95 (0.89,1.02)                                               | 0.96 (0.89, 1.03)                                                | 0.95 (0.88, 1.03)                                                 | 0.94 (0.87,1.02)                                               |
| Very preterm birth, <32 weeks <sup>f</sup>   | 1.15 (0.89,1.47)                                               | 1.11 (0.86, 1.43)                                                | 1.10 (0.85, 1.44)                                                 | 1.06 (0.82,1.37)                                               |

Abbreviations: CI, confidence interval; RR, risk ratio; HR, hazard ratio; NICU, neonatal intensive care unit; NAOI, neonatal adverse outcome indicator.

<sup>a</sup> Adjusted using propensity score matching.

<sup>b</sup> Adjusted for number of outpatient visits during the 6-month period prior to the index pregnancy. This sub-cohort was restricted to women with continuous Ontario insurance eligibility for the 6 months prior to pregnancy.

<sup>c</sup> Adjusted for number of non-obstetric hospitalization during the 2-year period prior to the index pregnancy. This sub-cohort was restricted to women with continuous Ontario insurance eligibility for the 2 years prior to pregnancy.

<sup>d</sup> Adjusted using stabilized inverse probability of treatment weights (IPTW) based on propensity score.

<sup>e</sup> Estimate values represent the risk ratios (RRs) that were estimated using a log-binomial regression model.

<sup>f</sup> Estimate values represent the hazard ratios (HR) that were estimated using a time-dependent Cox model, where Tdap vaccination was modelled as a time-varying exposure.

# Obstetric and perinatal health outcomes following pertussis immunization during pregnancy in Ontario, Canada

Figure. Comparison of standardized difference scores before and after propensity score (PS) matching

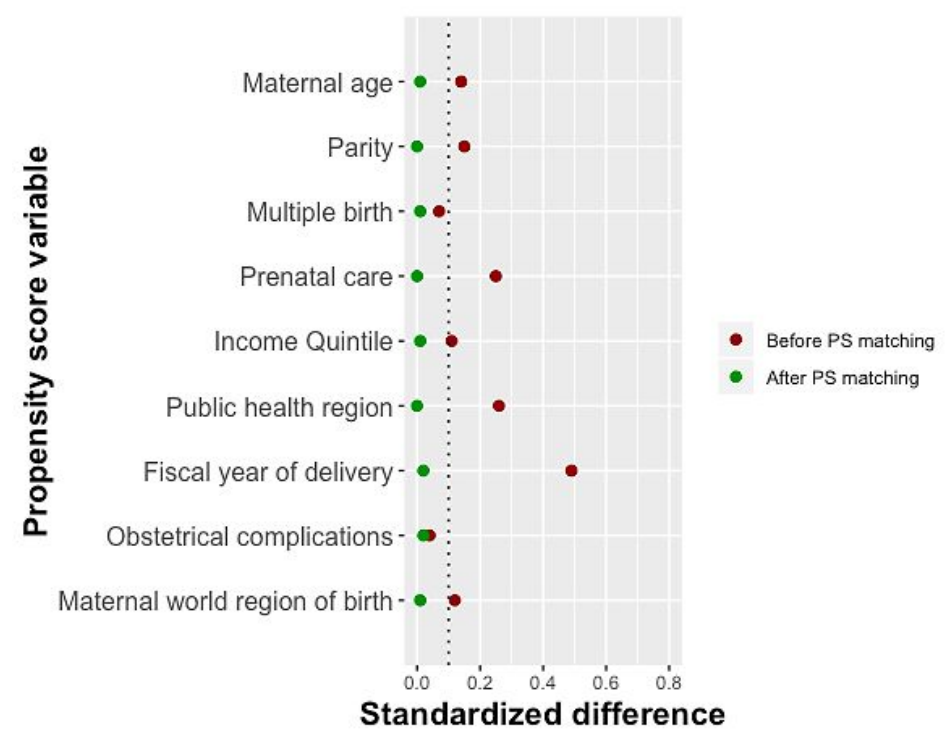

## Supplementary Methods—Coding algorithm for Revised Graduated Prenatal Care Utilization Index (R-GINDEX)

## Obstetric and perinatal health outcomes following pertussis immunization during pregnancy in Ontario, Canada

### Key Variables:

**GEST** = Gestational Age (18-45 weeks based on LMP)

**PCV** = Number of Prenatal Care Visits (0 = None)

**TPCB** = Trimester Prenatal Care Began (0 = None, 1-3 trimesters) \*

**GINDEX** = Graduated Prenatal Care Utilization Index

**\*NOTE:** Trimester 1 = (0-13 weeks or 1-91 days)  
 Trimester 2 = (14-27 weeks or 92-189 days)  
 Trimester 3 = (28+ weeks or 190+ days)

### INTENSIVE PRENATAL CARE UTILIZATION:

IF (TPCB=1) &

|                               |  |                               |
|-------------------------------|--|-------------------------------|
| (((18<=GEST<=21) & (11=<PCV)) |  | ((22<=GEST<=25) & (13=<PCV))  |
| ((26<=GEST<=29) & (14=<PCV))  |  | ((30<=GEST<=31) & (15=<PCV))  |
| ((32<=GEST<=36) & (16=<PCV))  |  | ((37<=GEST<=40) & (17=<PCV))  |
| ((41<=GEST<=42) & (18=<PCV))  |  | ((43<=GEST<=45) & (19=<PCV))) |

THEN GINDEX = 'INTENSIVE (1st Trimester)';

IF (TPCB=2) &

|                               |  |                               |
|-------------------------------|--|-------------------------------|
| (((18<=GEST<=21) & (10=<PCV)) |  | ((22<=GEST<=25) & (11=<PCV))  |
| ((26<=GEST<=31) & (12=<PCV))  |  | ((32<=GEST<=35) & (13=<PCV))  |
| ((36<=GEST<=37) & (14=<PCV))  |  | ((38<=GEST<=40) & (15=<PCV))  |
| ((41<=GEST<=42) & (16=<PCV))  |  | ((43<=GEST<=45) & (17=<PCV))) |

THEN GINDEX = 'INTENSIVE (2nd Trimester)';

IF (TPCB=3) &

|                               |  |                              |
|-------------------------------|--|------------------------------|
| (((GEST=25) & (9=<PCV))       |  | ((26<=GEST<=31) & (10=<PCV)) |
| ((32<=GEST<=35) & (11=<PCV))  |  | ((36<=GEST<=37) & (12=<PCV)) |
| ((38<=GEST<=40) & (13=<PCV))  |  | ((41<=GEST<=42) & (14=<PCV)) |
| ((43<=GEST<=45) & (15=<PCV))) |  |                              |

THEN GINDEX = 'INTENSIVE (3rd Trimester)';

### ADEQUATE PRENATAL CARE UTILIZATION CRITERIA:

IF (TPCB=1) &

|                                   |  |                                  |
|-----------------------------------|--|----------------------------------|
| (((18<=GEST<=21) & (3=<PCV<=10))  |  | ((22<=GEST<=25) & (4=<PCV<=12))  |
| ((26<=GEST <=29) & (5=<PCV<= 13)) |  | ((30<=GEST<=31) & (6=<PCV<= 14)) |

**Obstetric and perinatal health outcomes following pertussis immunization during pregnancy in Ontario, Canada**

1  
2  
3  
4  
5  
6  
7  
8  
9  
10  
11  
12  
13  
14  
15  
16  
17  
18  
19  
20  
21  
22  
23  
24  
25  
26  
27  
28  
29  
30  
31  
32  
33  
34  
35  
36  
37  
38  
39  
40  
41  
42  
43  
44  
45  
46  
47

```

| ((32<=GEST<=33) & (7=<PCV<=15)) | ((34<=GEST<=35) & (8=<PCV<=15))
| ((GEST=36) & (9=<PCV<=15)) | ((GEST =37) & (10<=PCV<=16))
| ((GEST=38) & (11=<PCV<=16)) | ((GEST =39) & (12<=PCV<=16))
| ((GEST=40) & (13=<PCV<=16)) | ((GEST =41) & (14<=PCV<=17))
| ((GEST=42) & (15=<PCV<=17)) | ((43<=GEST<=45) & (16<=PCV<=18)))

```

THEN GINDEX = 'ADEQUATE (1st Trimester)';

**INTERMEDIATE PRENATAL CARE UTILIZATION CRITERIA:**

IF (TPCB=1) &

```

(((18<=GEST<=21) & (1=<PCV<=2)) | ((22<=GEST<=25) & (2=<PCV<=3))
| ((26<=GEST<=29) & (2=<PCV<=4)) | ((30<=GEST<=31) & (3=<PCV<=5))
| ((32<=GEST<=33) & (4=<PCV<=6)) | ((34<=GEST<=35) & (5=<PCV<=7))
| ((GEST=36) & (5=<PCV<=8)) | ((GEST=37) & (6=<PCV<=9))
| ((GEST=38) & (7=<PCV<=10)) | ((GEST=39) & (7=<PCV<=11))
| ((GEST=40) & (8=<PCV<=12)) | ((GEST=41) & (8=<PCV<=13))
| ((GEST=42) & (9=<PCV<=14)) | ((43<=GEST<=45) & (9=<PCV<=15)))

```

THEN GINDEX = 'INTERMEDIATE (1st Trimester)';

IF (TPCB=2) &

```

(((18<=GEST<=21) & (1=<PCV<=9)) | ((22<=GEST<=25) & (2=<PCV<=10))
| ((26<=GEST<=29) & (2=<PCV<=11)) | ((30<=GEST<=31) & (3=<PCV<=11))
| ((32<=GEST<=33) & (4=<PCV<=12)) | ((34<=GEST<=35) & (5=<PCV<=12))
| ((36<=GEST<=37) & (6=<PCV<=13)) | ((38<=GEST<=39) & (7=<PCV<=14))
| ((GEST=40) & (8=<PCV<=14)) | ((GEST =41) & (8=<PCV<=15))
| ((GEST=42) & (9=<PCV<=15)) | ((43<=GEST<=45) & (9=<PCV<=16)))

```

THEN GINDEX = 'INTERMEDIATE (2nd Trimester)';

**INADEQUATE PRENATAL CARE UTILIZATION CRITERIA:**

IF (TPCB=1) &

```

(((22<=GEST<=29) & (PCV=1)) | ((30<=GEST<=31) & (1=<PCV<=2))
| ((32<=GEST<=33) & (1=<PCV<=3)) | ((34<=GEST<=36) & (1=<PCV<=4))
| ((GEST=37) & (1=<PCV<=5)) | ((38<=GEST<=39) & (1=<PCV<=6))
| ((40<=GEST<=41) & (1=<PCV<=7)) | ((42<=GEST<=45) & (1=<PCV<=8)))

```

THEN GINDEX = 'INADEQUATE (1st Trimester)';

IF (TPCB=2) &

## Obstetric and perinatal health outcomes following pertussis immunization during pregnancy in Ontario, Canada

```

1
2
3      (((22<=GEST<=29) & (PCV=1))      |      ((30<=GEST<=31) & (1<=PCV<=2))
4      | ((32<=GEST<=33) & (1<=PCV<=3)) |      ((34<=GEST<=35) & (1<=PCV<=4))
5      | ((36<=GEST<=37) & (1<=PCV<=5)) |      ((38<=GEST<=39) & (1<=PCV<=6))
6      | ((40<=GEST<=41) & (1<=PCV<=7)) |      ((42<=GEST<=45) & (1<=PCV<=8)))
7

```

THEN GINDEX = 'INADEQUATE (2nd Trimester)';

IF (TPCB=3) &

```

9      (((GEST =25) & (1<=PCV<=8))      |      ((26<=GEST<=31) & (1<=PCV<=9))
10     | ((32<=GEST<=35) & (1<=PCV<=10)) |      ((36<=GEST<=37) & (1<=PCV<=11))
11     | ((38<=GEST<=40) & (1<=PCV<=12)) |      ((41<=GEST<=42) & (1<=PCV<=13))
12     | ((43<=GEST<=45) & (1<=PCV<=14)))
13

```

THEN GINDEX = 'INADEQUATE (3rd Trimester)';

### MISSING PRENATAL CARE CRITERIA:

```

17
18 IF (((PCV=.) & (TPCB^=0))      |      ((TPCB=3) & (1<=GEST<=24))
19 | ((TPCB=2) & (1<=GEST<=11))  |      ((GEST=.) & (PCV^=0))
20 | ((TPCB=.) & (PCV^=0))      |      (TPCB=0 & (PCV>0)))
21

```

THEN GINDEX = 'MISSING';

### NO PRENATAL CARE UTILIZATION:

```

24
25 IF (PCV=0)      |      (TPCB=0 & PCV=.)
26

```

THEN GINDEX = 'NOCARE';
